# Supplementary material
Source: publisher figshare collection journal article supplement (https://acs.figshare.com/ndownloader/files/4211590)

## Supporting information

Figure S1. XPS spectrum of the sample in Figure 1.

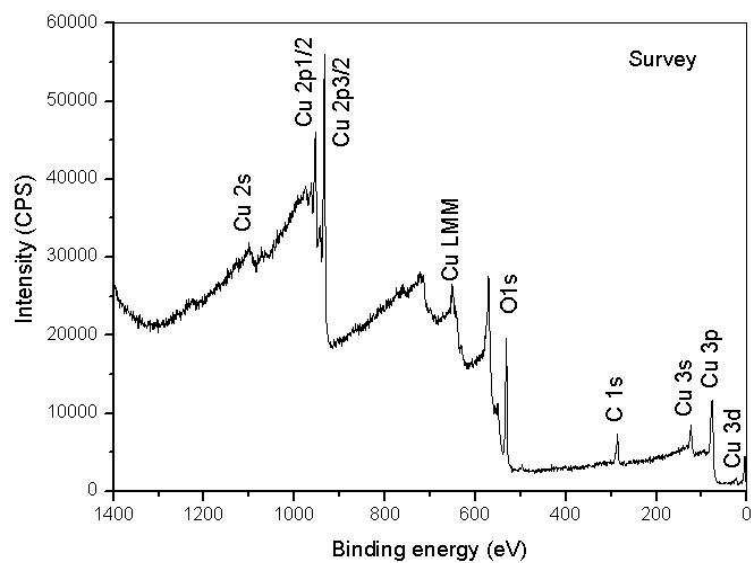

Figure S2 XRD pattern of the sample in Figure 1.

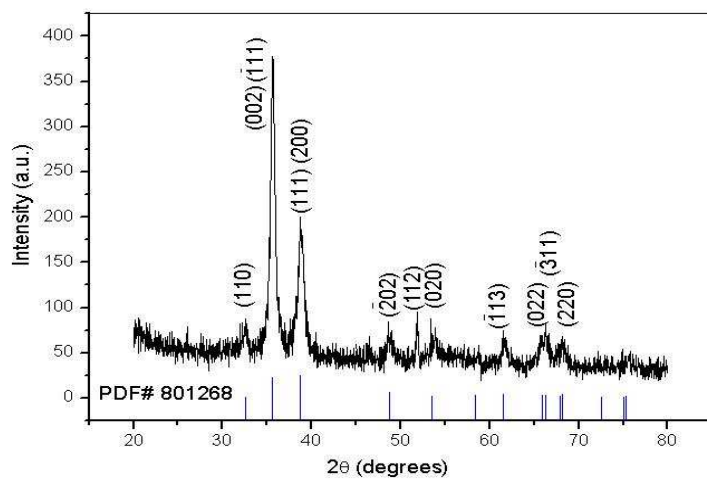

Figure S3 Water CAs on different surfaces. (A) CuO film by PLD without using colloidal monolayer. (B) Hierarchical submicro/nanostructured arrays produced by PLD using colloidal monolayer with PS sphere sizes of 350 nm. (C) Hierarchical micro/nanostructured arrays produced by PLD using colloidal monolayer with PS sphere sizes of 2  $\mu\text{m}$ . The water CA of the surfaces is (A) 22.9°, (B) 19.2°, and (C) 15.3°.

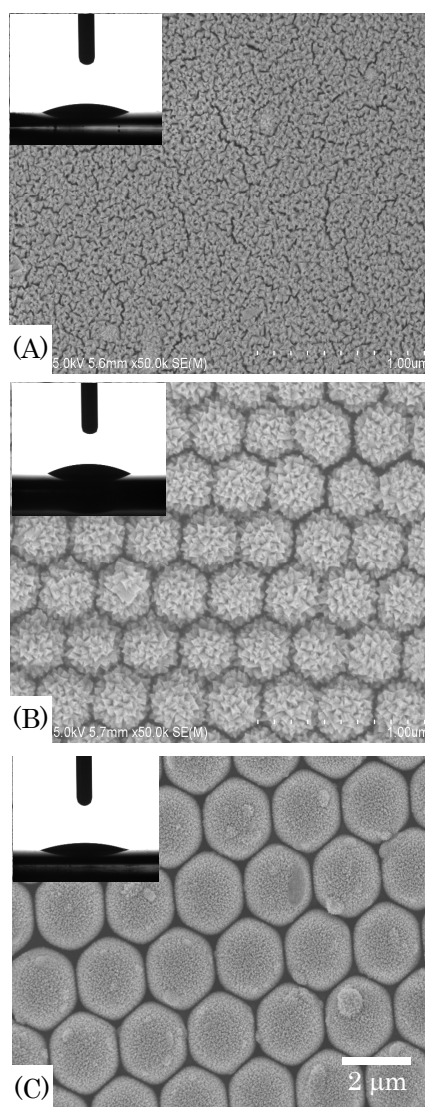

Supplement: Supplementary file 1 [file 4211590]
